# Supplementary material for: Niche Characteristics of Alternanthera philoxeroide-Invaded Plant Communities in Heterogeneous Habitats and Their Latitudinal Trends
Source: MDPI journal article supplement (doi:10.3390/d15050651), 2023-05-11
Supplement: s1 [file s1]

**Table S1.** Sampling plots of *A. philoxeroides*-invaded communities in terrestrial and aquatic habitats.

| Terrestrial plot | Geographic location     | Invasion coverage/% | Site type      | Aquatic plot | Geographic location     | Invasion coverage/% | Site type     |
|------------------|-------------------------|---------------------|----------------|--------------|-------------------------|---------------------|---------------|
| 1                | 21°54'17"N, 110°52'32"E | 69                  | Roadside       | 1            | 21°54'41"N, 110°51'52"E | 62                  | Water channel |
| 2                | 21°54'42"N, 110°51'52"E | 54                  | Garden         | 2            | 21°54'58"N, 110°53'45"E | 66                  | Pond          |
| 3                | 21°55'10"N, 110°53'07"E | 49                  | Farmland       | 3            | 21°50'31"N, 111°57'47"E | 50                  | Water channel |
| 4                | 21°50'44"N, 111°57'22"E | 57                  | Garden         | 4            | 21°50'04"N, 111°56'12"E | 52                  | Puddle        |
| 5                | 21°50'04"N, 111°57'25"E | 56                  | Abandoned land | 5            | 21°59'48"N, 111°56'19"E | 49                  | Puddle        |
| 6                | 23°24'17"N, 111°29'59"E | 44                  | Roadside       | 6            | 23°23'56"N, 111°30'53"E | 79                  | Pond          |
| 7                | 23°24'12"N, 111°29'59"E | 35                  | Garden         | 7            | 23°38'54"N, 114°42'00"E | 61                  | Water channel |
| 8                | 23°24'26"N, 111°29'32"E | 48                  | Riparian zone  | 8            | 23°39'23"N, 114°41'45"E | 71                  | Pond          |
| 9                | 23°43'26"N, 114°42'45"E | 36                  | Garden         | 9            | 23°39'28"N, 114°41'39"E | 32                  | Puddle        |
| 10               | 23°43'22"N, 114°43'09"E | 43                  | Garden         | 10           | 23°42'32"N, 114°42'10"E | 66                  | Water channel |
| 11               | 25°38'21"N, 110°40'38"E | 63                  | Garden         | 11           | 25°38'27"N, 110°40'34"E | 89                  | Puddle        |
| 12               | 25°33'44"N, 110°40'03"E | 64                  | Roadside       | 12           | 25°37'58"N, 110°40'10"E | 69                  | Paddy         |
| 13               | 25°38'06"N, 114°46'11"E | 75                  | Roadside       | 13           | 25°37'57"N, 110°40'09"E | 61                  | Pond          |
| 14               | 25°38'10"N, 114°44'27"E | 52                  | Farmland       | 14           | 25°38'39"N, 114°44'37"E | 46                  | Paddy         |
| 15               | 25°38'33"N, 114°44'33"E | 62                  | Roadside       | 15           | 25°38'32"N, 114°44'33"E | 38                  | Puddle        |
| 16               | 27°58'41"N, 113°02'08"E | 75                  | Roadside       | 16           | 27°48'05"N, 112°59'28"E | 87                  | Pond          |
| 17               | 27°57'53"N, 113°00'56"E | 71                  | Roadside       | 17           | 27°48'07"N, 112°59'27"E | 53                  | Pond          |
| 18               | 27°26'38"N, 115°19'19"E | 47                  | Roadside       | 18           | 27°48'39"N, 112°57'58"E | 73                  | Pond          |
| 19               | 27°38'16"N, 115°19'44"E | 67                  | Abandoned land | 19           | 27°36'56"N, 115°19'09"E | 89                  | River         |

|    |                         |    |                |    |                         |    |               |
|----|-------------------------|----|----------------|----|-------------------------|----|---------------|
| 20 | 27°36'58"N, 115°19'08"E | 46 | Garden         | 20 | 27°36'56"N, 115°19'10"E | 79 | River         |
| 21 | 29°59'27"N, 113°56'42"E | 67 | Riparian zone  | 21 | 30°43'08"N, 114°04'20"E | 90 | Puddle        |
| 22 | 30°00'14"N, 113°58'16"E | 73 | Roadside       | 22 | 30°00'13"N, 113°58'17"E | 85 | Puddle        |
| 23 | 29°56'28"N, 113°58'23"E | 71 | Abandoned land | 23 | 29°19'47"N, 115°45'54"E | 79 | Puddle        |
| 24 | 29°20'44"N, 115°47'06"E | 48 | Roadside       | 24 | 29°19'43"N, 115°45'53"E | 92 | Pond          |
| 25 | 29°19'44"N, 115°45'54"E | 64 | Farmland       | 25 | 29°15'50"N, 115°42'28"E | 82 | Pond          |
| 26 | 32°04'44"N, 114°06'94"E | 64 | Riparian zone  | 26 | 32°07'86"N, 114°01'84"E | 85 | Puddle        |
| 27 | 32°02'79"N, 114°08'78"E | 54 | Garden         | 27 | 32°03'69"N, 114°07'76"E | 91 | Pond          |
| 28 | 32°34'83"N, 117°08'50"E | 69 | Abandoned land | 28 | 32°03'14"N, 114°08'50"E | 62 | Paddy         |
| 29 | 32°35'09"N, 117°09'50"E | 55 | Farmland       | 29 | 32°35'57"N, 117°08'06"E | 91 | Pond          |
| 30 | 32°33'54"N, 117°08'64"E | 48 | Farmland       | 30 | 32°35'02"N, 117°08'08"E | 67 | Water channel |
| 31 | 33°55'63"N, 113°55'31"E | 58 | Roadside       | 31 | 33°50'21"N, 114°01'99"E | 89 | River         |
| 32 | 34°07'82"N, 113°45'56"E | 48 | Farmland       | 32 | 33°49'86"N, 114°01'37"E | 91 | River         |
| 33 | 34°08'86"N, 113°42'78"E | 23 | Roadside       | 33 | 34°22'21"N, 117°16'09"E | 77 | Water channel |
| 34 | 34°20'36"N, 117°16'10"E | 61 | Farmland       | 34 | 34°21'76"N, 117°16'03"E | 92 | Pond          |
| 35 | 34°22'08"N, 117°16'01"E | 70 | Abandoned land | 35 | 34°22'21"N, 117°15'51"E | 79 | River         |
| 36 | 36°22'23"N, 114°24'66"E | 59 | Riparian zone  | 36 | 36°22'96"N, 114°24'90"E | 54 | River         |
| 37 | 36°25'32"N, 114°25'05"E | 82 | Riparian zone  | 37 | 36°22'13"N, 114°24'14"E | 95 | River         |
| 38 | 36°13'31"N, 116°46'91"E | 66 | Roadside       | 38 | 36°22'39"N, 114°20'26"E | 57 | River         |
| 39 | 36°13'01"N, 116°45'76"E | 37 | Abandoned land | 39 | 36°12'49"N, 116°44'54"E | 82 | River         |
| 40 | 36°13'09"N, 116°45'25"E | 57 | Abandoned land | 40 | 36°13'06"N, 116°45'26"E | 78 | River         |

**Table S2.** The functional traits of species with high-frequency in terrestrial and aquatic *A. philoxeroides*-invaded communities.

| Code                  | Plant species                      | Frequency | Persistence | Propagation forms     | Code              | Plant science                      | Frequency | Persistence | Propagation forms     |
|-----------------------|------------------------------------|-----------|-------------|-----------------------|-------------------|------------------------------------|-----------|-------------|-----------------------|
| Terrestrial community |                                    |           |             |                       | Aquatic community |                                    |           |             |                       |
| 1                     | <i>Alternanthera philoxeroides</i> | 40        | Perennial   | Vegetative            | 1                 | <i>Alternanthera philoxeroides</i> | 40        | Perennial   | Vegetative            |
| 2                     | <i>Digitaria sanguinalis</i>       | 30        | Annual      | Generative            | 2                 | <i>Paspalum paspaloides</i>        | 25        | Perennial   | Vegetative/Generative |
| 3                     | <i>Echinochloa crusgalli</i>       | 28        | Annual      | Generative            | 3                 | <i>Polygonum hydropiper</i>        | 20        | Annual      | Generative            |
| 4                     | <i>Bidens pilosa</i>               | 25        | Annual      | Generative            | 4                 | <i>Echinochloa crusgalli</i>       | 18        | Annual      | Generative            |
| 5                     | <i>Ipomoea nil</i>                 | 23        | Annual      | Generative            | 5                 | <i>Bidens pilosa</i>               | 14        | Annual      | Generative            |
| 6                     | <i>Eleusine indica</i>             | 22        | Annual      | Vegetative/Generative | 6                 | <i>Commelina communis</i>          | 9         | Annual      | Vegetative/Generative |
| 7                     | <i>Cyperus rotundus</i>            | 21        | Perennial   | Vegetative/Generative | 7                 | <i>Cyperus rotundus</i>            | 8         | Perennial   | Vegetative            |
| 8                     | <i>Setaria viridis</i>             | 19        | Annual      | Generative            | 8                 | <i>Kyllinga brevifolia</i>         | 7         | Perennial   | Vegetative            |
| 9                     | <i>Commelina communis</i>          | 18        | Annual      | Vegetative/Generative | 9                 | <i>Eclipta prostrata</i>           | 7         | Annual      | Generative            |
| 10                    | <i>Cyperus rotundus</i>            | 16        | Perennial   | Vegetative            | 10                | <i>Humulus scandens</i>            | 7         | Perennial   | Vegetative/Generative |
| 11                    | <i>Acalypha australis</i>          | 16        | Annual      | Vegetative            | 11                | <i>Ipomoea nil</i>                 | 7         | Annual      | Generative            |
| 12                    | <i>Humulus scandens</i>            | 15        | Perennial   | Vegetative/Generative | 12                | <i>Lemna minor</i>                 | 6         | Annual      | Vegetative            |
| 13                    | <i>Ageratum conyzoides</i>         | 15        | Annual      | Vegetative/Generative | 13                | <i>Digitaria sanguinalis</i>       | 6         | Annual      | Generative            |
| 14                    | <i>Erigeron canadensis</i>         | 15        | Annual      | Generative            | 14                | <i>Acorus calamus</i>              | 5         | Perennial   | Vegetative/Generative |
| 15                    | <i>Artemisia argyi</i>             | 15        | Perennial   | Vegetative            | 15                | <i>Glycine soja</i>                | 5         | Annual      | Generative            |
| 16                    | <i>Eclipta prostrata</i>           | 15        | Annual      | Generative            | 16                | <i>Alternanthera sessilis</i>      | 5         | Perennial   | Vegetative/Generative |
| 17                    | <i>Cynodon dactylon</i>            | 14        | Perennial   | Vegetative            | 17                | <i>Eleusine indica</i>             | 5         | Annual      | Vegetative/Generative |
| 18                    | <i>Polygonum hydropiper</i>        | 14        | Annual      | Generative            | 18                | <i>Trigastrotheca stricta</i>      | 5         | Annual      | Vegetative            |
| 19                    | <i>Amaranthus blitum</i>           | 13        | Annual      | Generative            | 19                | <i>Cyperus rotundus</i>            | 5         | Perennial   | Vegetative/Generative |

|    |                                |    |           |                       |    |                                  |   |           |            |
|----|--------------------------------|----|-----------|-----------------------|----|----------------------------------|---|-----------|------------|
| 20 | <i>Erigeron annuus</i>         | 12 | Annual    | Generative            | 20 | <i>Polygonum perfoliatum</i>     | 4 | Annual    | Generative |
| 21 | <i>Oxalis corniculata</i>      | 10 | Perennial | Vegetative/Generative | 21 | <i>Phragmites australis</i>      | 4 | Perennial | Vegetative |
| 22 | <i>Paspalum paspaloides</i>    | 9  | Perennial | Vegetative/Generative | 22 | <i>Senna tora</i>                | 4 | Annual    | Generative |
| 23 | <i>Broussonetia papyrifera</i> | 9  | Perennial | Vegetative/Generative | 23 | <i>Symphytotrichum subulatum</i> | 4 | Annual    | Generative |
| 24 | <i>Ludwigia prostrata</i>      | 9  | Annual    | Generative            | 24 | <i>Microstegium nodosum</i>      | 4 | Annual    | Generative |
| 25 | <i>Portulaca oleracea</i>      | 9  | Annual    | Vegetative/Generative |    |                                  |   |           |            |
